# Supplementary material for: Perinuclear Lamin A and Nucleoplasmic Lamin B2 Characterize Two Types of Hippocampal Neurons through Alzheimer’s Disease Progression
Source: PubMed Central journal article supplement (PMC7084765; doi:10.3390/ijms21051841), 2020-03-07
Supplement: ijms-21-01841-s001.pdf [file ijms-21-01841-s001.pdf]

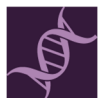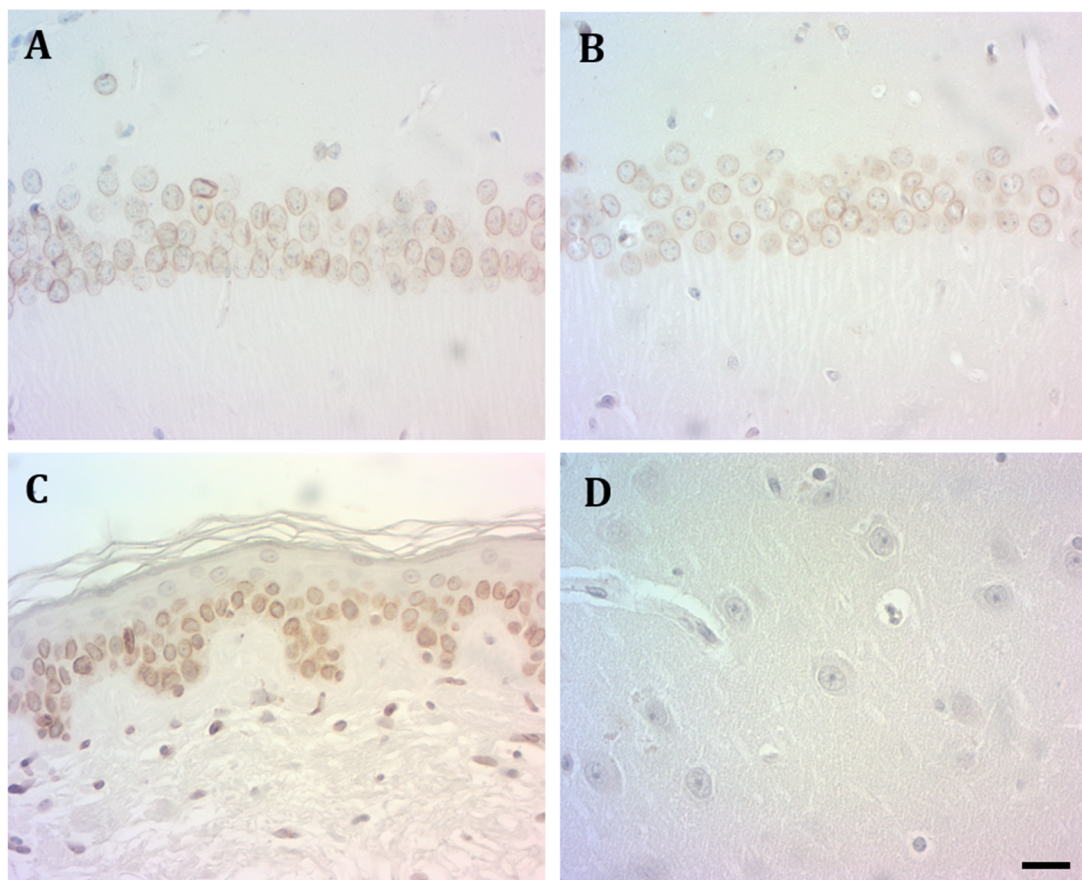

**Supp. Figure S1** Lamin C. Immunopositivity to Lamin C antibody was clearly observed in the hippocampus of *wild type* mouse (A), triple transgenic AD mouse model (B) and human epidermis (C), but it was completely absent from human hippocampus (D), scale bar 10  $\mu$ m

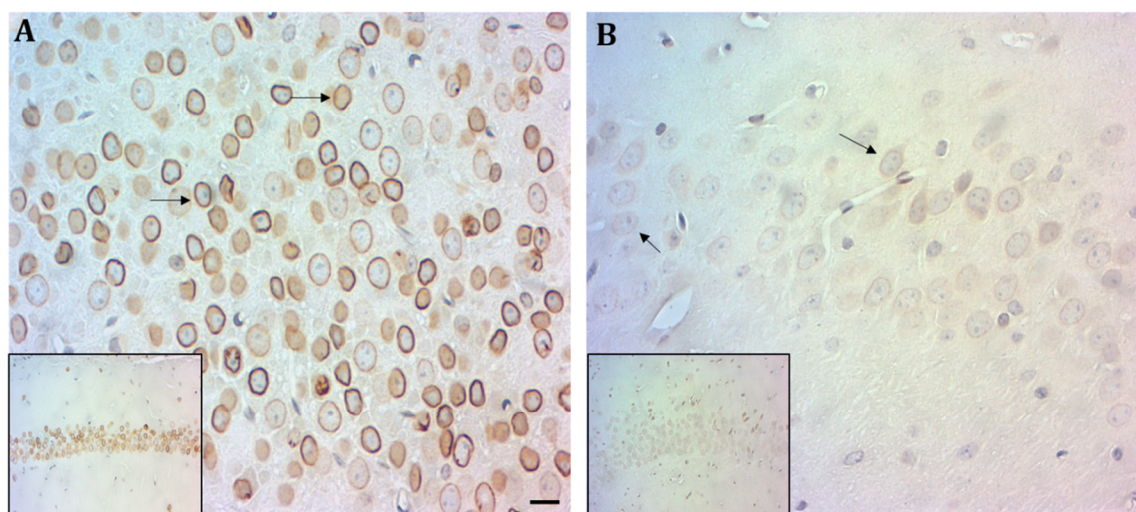

**Supp. Figure S2.** Test of Lamin B2 and Lamin A in the triple transgenic AD mouse model. Populations of nucleoplasmic and perinuclear Lamin B2 (A,arrows) in the CA1 region (insert). Slight perinuclear Lamin A immunopositivity (B, arrows) in the CA1 region (insert). Scale bar 10  $\mu$ m
